# Supplementary material for: Environmental and Agro-Economic Sustainability of Olive Orchards Irrigated with Reclaimed Water under Deficit Irrigation
Source: MDPI journal article supplement (doi:10.3390/su152015101), 2023-10-20
Supplement: s1 [file s1]

Archive with 1 entries (1 files):
- sustainability-2622250-supplementary.pdf
